# Supplementary material for: Elucidating the local structure of Li1+xAlxTi2−x(PO4)3 and Li3AlxTi2−x(PO4)3 (x = 0, 0.3) via total scattering
Source: Royal Society of Chemistry journal article supplement (doi:10.1039/d4qi01545b), 2024-01-01
Supplement: d4qi01545b1.pdf [file d4qi01545b1.pdf]

## **Elucidating the local structure of $\text{Li}_{1+x}\text{Al}_x\text{Ti}_{2-x}(\text{PO}_4)_3$ and $\text{Li}_3\text{Al}_x\text{Ti}_{2-x}(\text{PO}_4)_3$ ( $x = 0, 0.3$ ) via total scattering**

Matthew S. Chambers<sup>\*a</sup>, Jue Liu<sup>b</sup>, Olaf J. Borkiewicz<sup>c</sup>, Kevin Llopart<sup>a</sup>, Robert L Sacci<sup>a</sup>, Gabriel M. Veith<sup>\*a</sup>

<sup>a</sup>Chemical Sciences division, Oak Ridge National Laboratory, Oak Ridge, Tennessee 37831, United States

<sup>b</sup>Neutron Scattering Division, Oak Ridge National Laboratory, Oak Ridge, Tennessee 37831, United States

<sup>c</sup>X-ray Science Division, Advanced Photon Source, Argonne National Laboratory, Lemont, Illinois 60439, United States

Corresponding authors' e-mail addresses:

chambersms1@ornl.gov (Matthew S. Chambers), veithgm@ornl.gov (Gabriel M. Veith)

## **Supporting Information**

## $\text{Li}_3\text{Ti}_2(\text{PO}_4)_3$ appearance

(a) Before heating

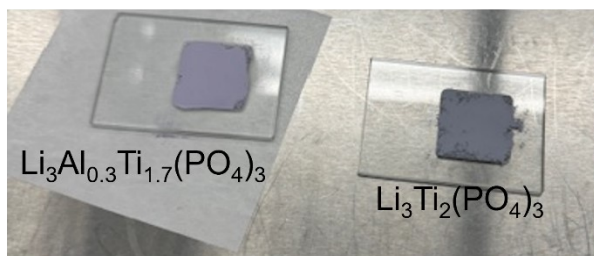

(b) After 925 °C 2 h (under Ar)

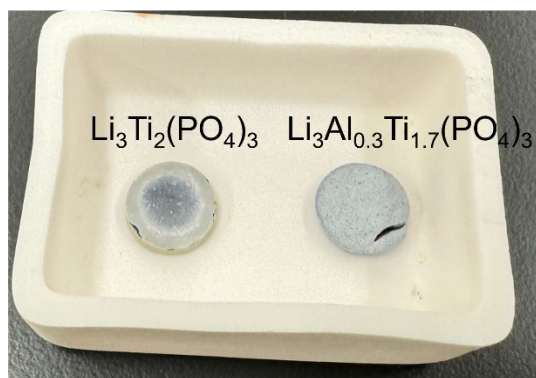

**Figure S1** – Appearance of  $\text{Li}_3\text{Al}_x\text{Ti}_{2-x}(\text{PO}_4)_3$  ( $x=0, 0.3$ ) (a) Before heating; (b) after heating at 925 °C under Ar for 2 h with heating and cooling rates of 5 °C  $\text{min}^{-1}$ .

## X-ray total scattering sample holders and heating environment

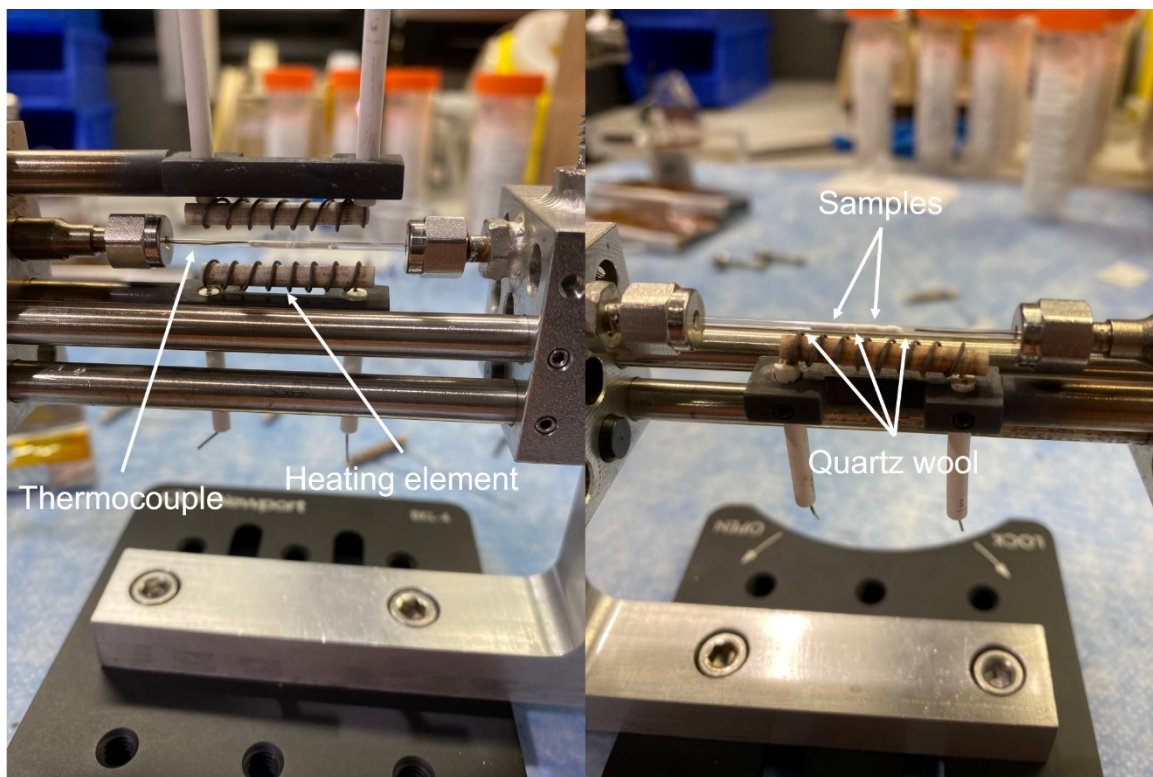

**Figure S2** – Sample holders used in the X-ray total scattering experiment.

## Laboratory X-ray patterns

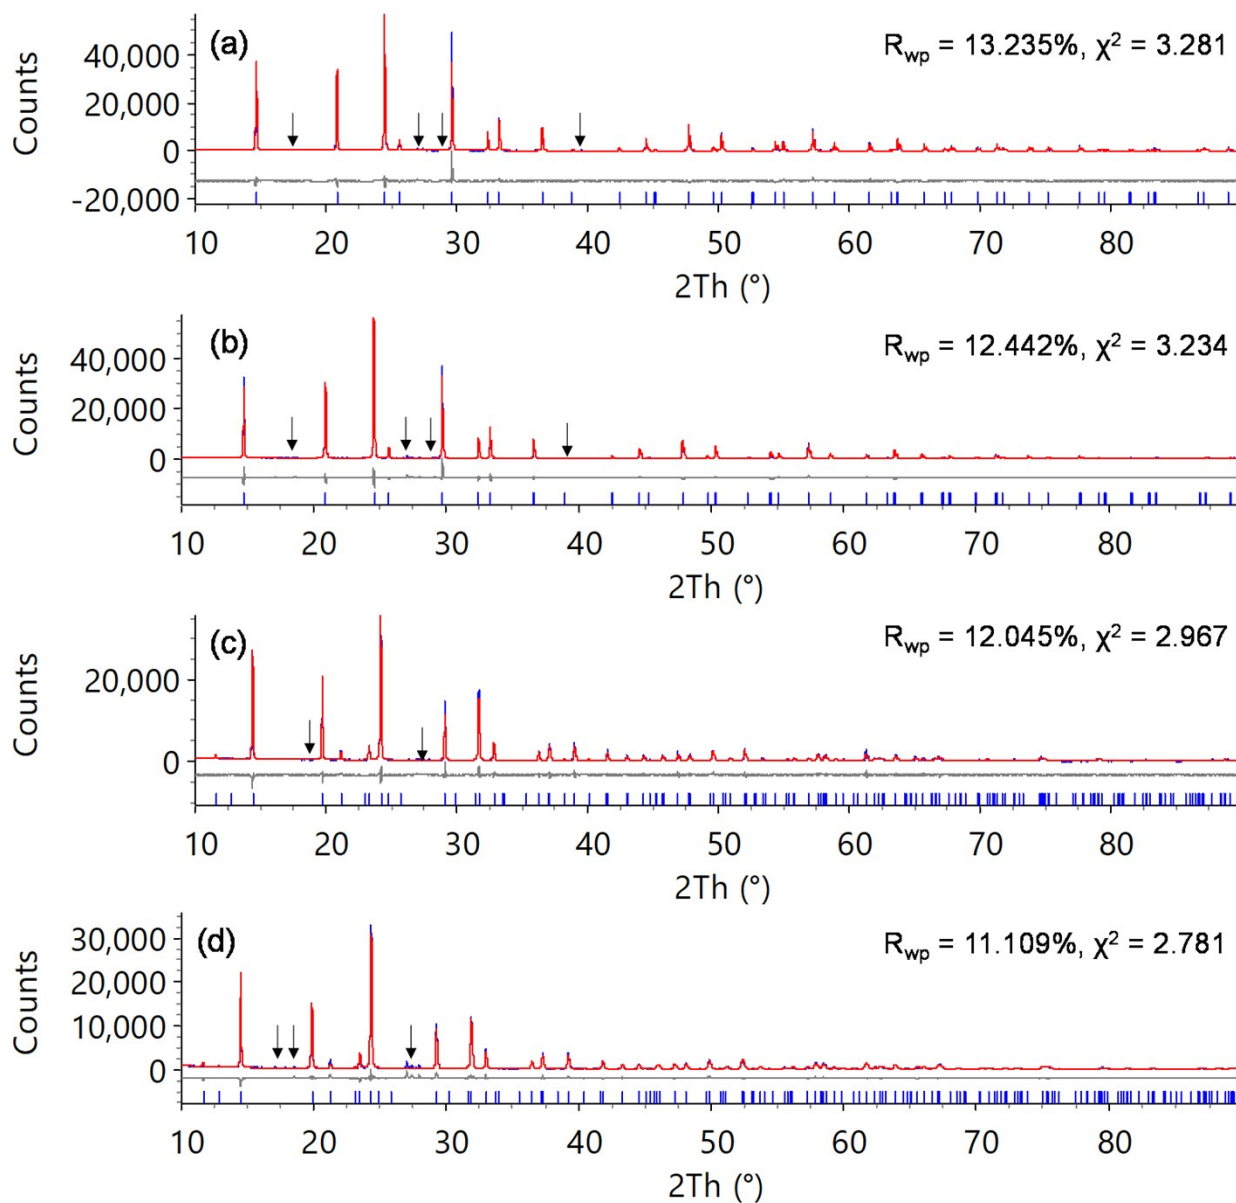

**Figure S3** – Rietveld plots of  $\text{Li}_{1+x}\text{Al}_x\text{Ti}_{2-x}(\text{PO}_4)_3$  and  $\text{Li}_3\text{Al}_x\text{Ti}_{2-x}(\text{PO}_4)_3$  synthesized through the solid-state method. (a)  $\text{LiTi}_2(\text{PO}_4)_3$ ; (b)  $\text{Li}_{1.3}\text{Al}_{0.3}\text{Ti}_{1.7}(\text{PO}_4)_3$ ; (c)  $\text{Li}_3\text{Ti}_2(\text{PO}_4)_3$ ; (d)  $\text{Li}_3\text{Al}_{0.3}\text{Ti}_{1.7}(\text{PO}_4)_3$ . Blue curves = observed data; red curves = calculated pattern; grey curves = difference between observed and calculated. Blue tick marks correspond to reflections arising from  $\text{Li}_{1+x}\text{Al}_x\text{Ti}_{2-x}(\text{PO}_4)_3$  or  $\text{Li}_3\text{Al}_x\text{Ti}_{2-x}(\text{PO}_4)_3$ . Black arrows indicate unaccounted peaks.

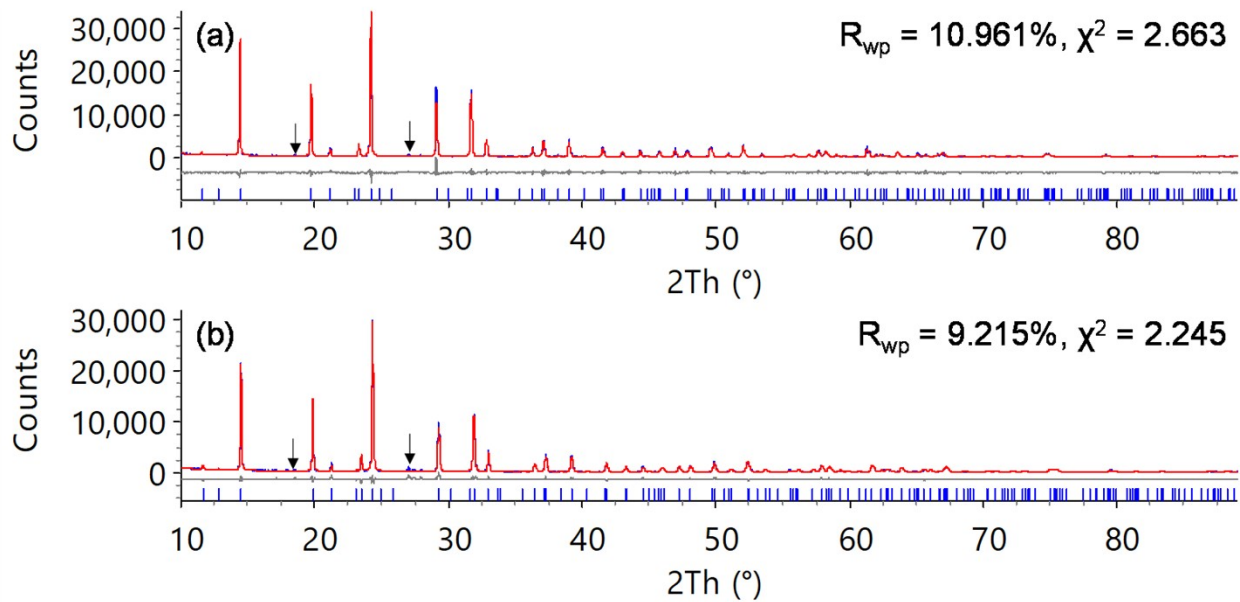

**Figure S4** – Laboratory X-ray Rietveld plots of  $\text{Li}_3\text{Al}_x\text{Ti}_{2-x}(\text{PO}_4)_3$  ( $x = 0, 0.3$ ) made for conductivity measurements; (a)  $\text{Li}_3\text{Ti}_2(\text{PO}_4)_3$ ; (b)  $\text{Li}_3\text{Al}_{0.3}\text{Ti}_{1.7}(\text{PO}_4)_3$ . Blue curves = observed data; red curves = calculated pattern; grey curves = difference between observed and calculated. Blue tick marks correspond to reflections arising from  $\text{Li}_3\text{Al}_x\text{Ti}_{2-x}(\text{PO}_4)_3$ . Black arrows indicate unaccounted peaks.

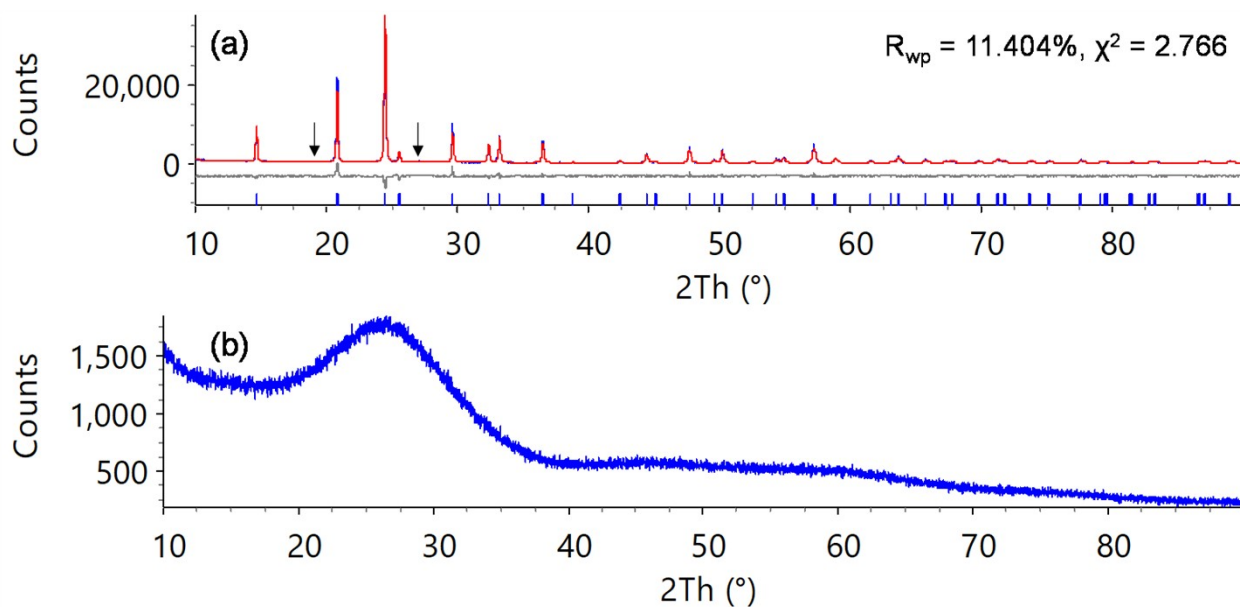

**Figure S5** – Laboratory X-ray Rietveld plot and diffraction patterns of sol-gel-synthesized  $\text{LiTi}_2(\text{PO}_4)_3$ . (a)  $\text{LiTi}_2(\text{PO}_4)_3$  heated to  $800^\circ\text{C}$ ; (b)  $\text{LiTi}_2(\text{PO}_4)_3$  heated to  $300^\circ\text{C}$ .

## Sol-gel synchrotron Bragg scattering patterns

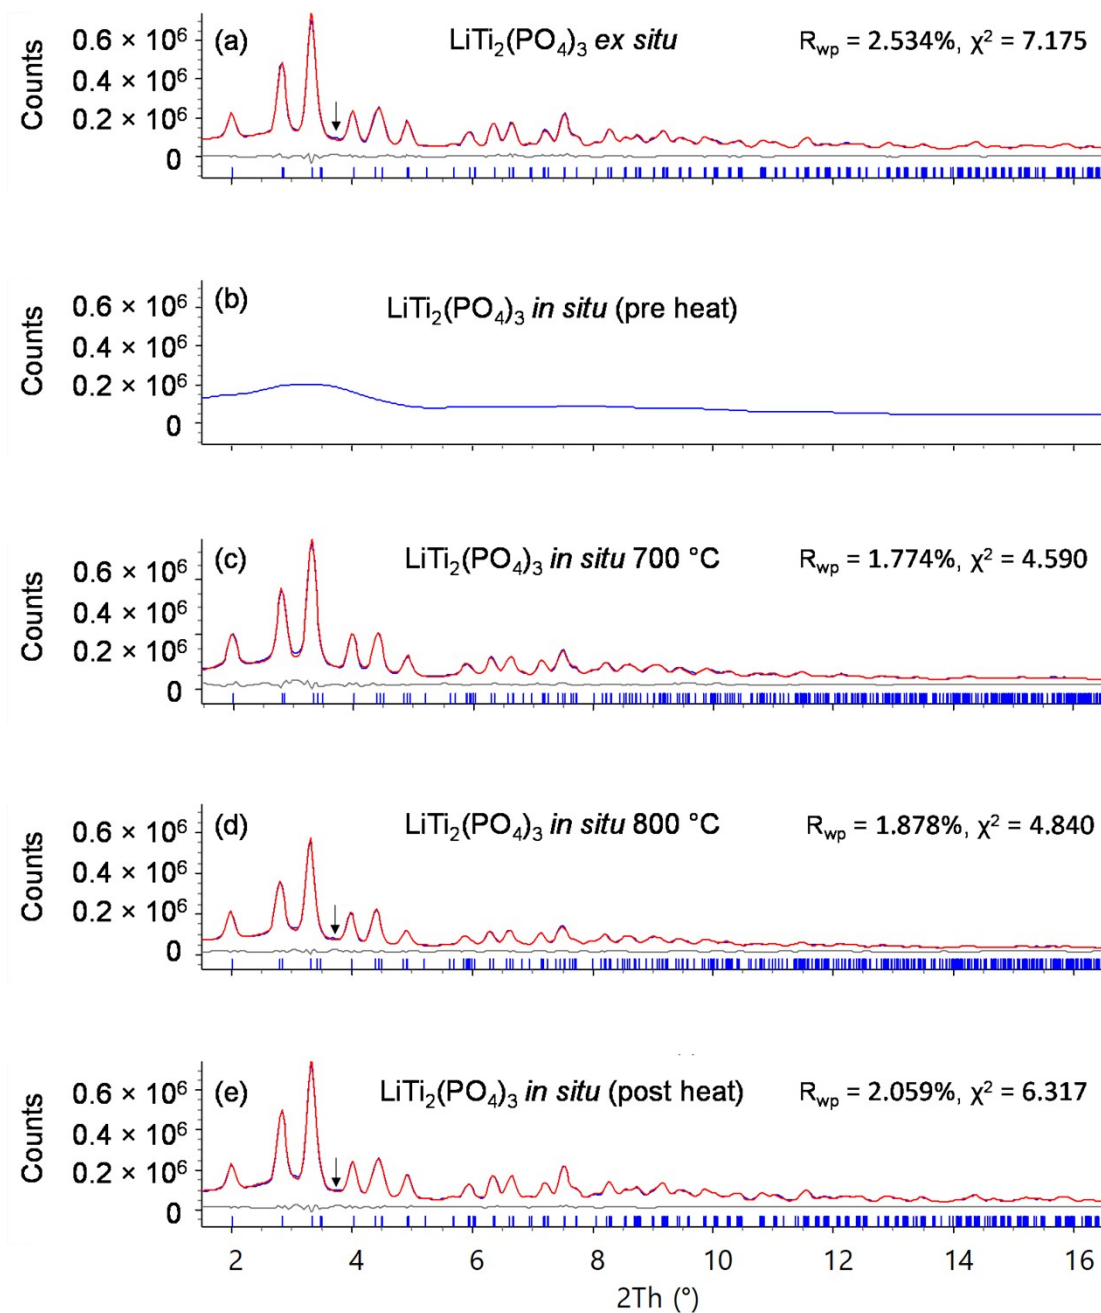

**Figure S6** – Synchrotron Rietveld plots and powder patterns for sol-gel syntheses of  $\text{LiTi}_2(\text{PO}_4)_3$  at 25 °C (a) *ex situ* sol-gel  $\text{LiTi}_2(\text{PO}_4)_3$ ; (b) *in situ*  $\text{LiTi}_2(\text{PO}_4)_3$  pre-heating; (c) *in situ*  $\text{LiTi}_2(\text{PO}_4)_3$  at 700 °C; (d) *in situ*  $\text{LiTi}_2(\text{PO}_4)_3$  at 800 °C; (e) *in situ*  $\text{LiTi}_2(\text{PO}_4)_3$  post-heating. Blue curves = observed data; red curves = calculated patterns; grey curves = difference between observed and calculated patterns; blue tick marks = reflections arising from  $\text{LiTi}_2(\text{PO}_4)_3$ . For (b), the pattern largely derives from the quartz capillary.

*In-situ* sol-gel XPDF

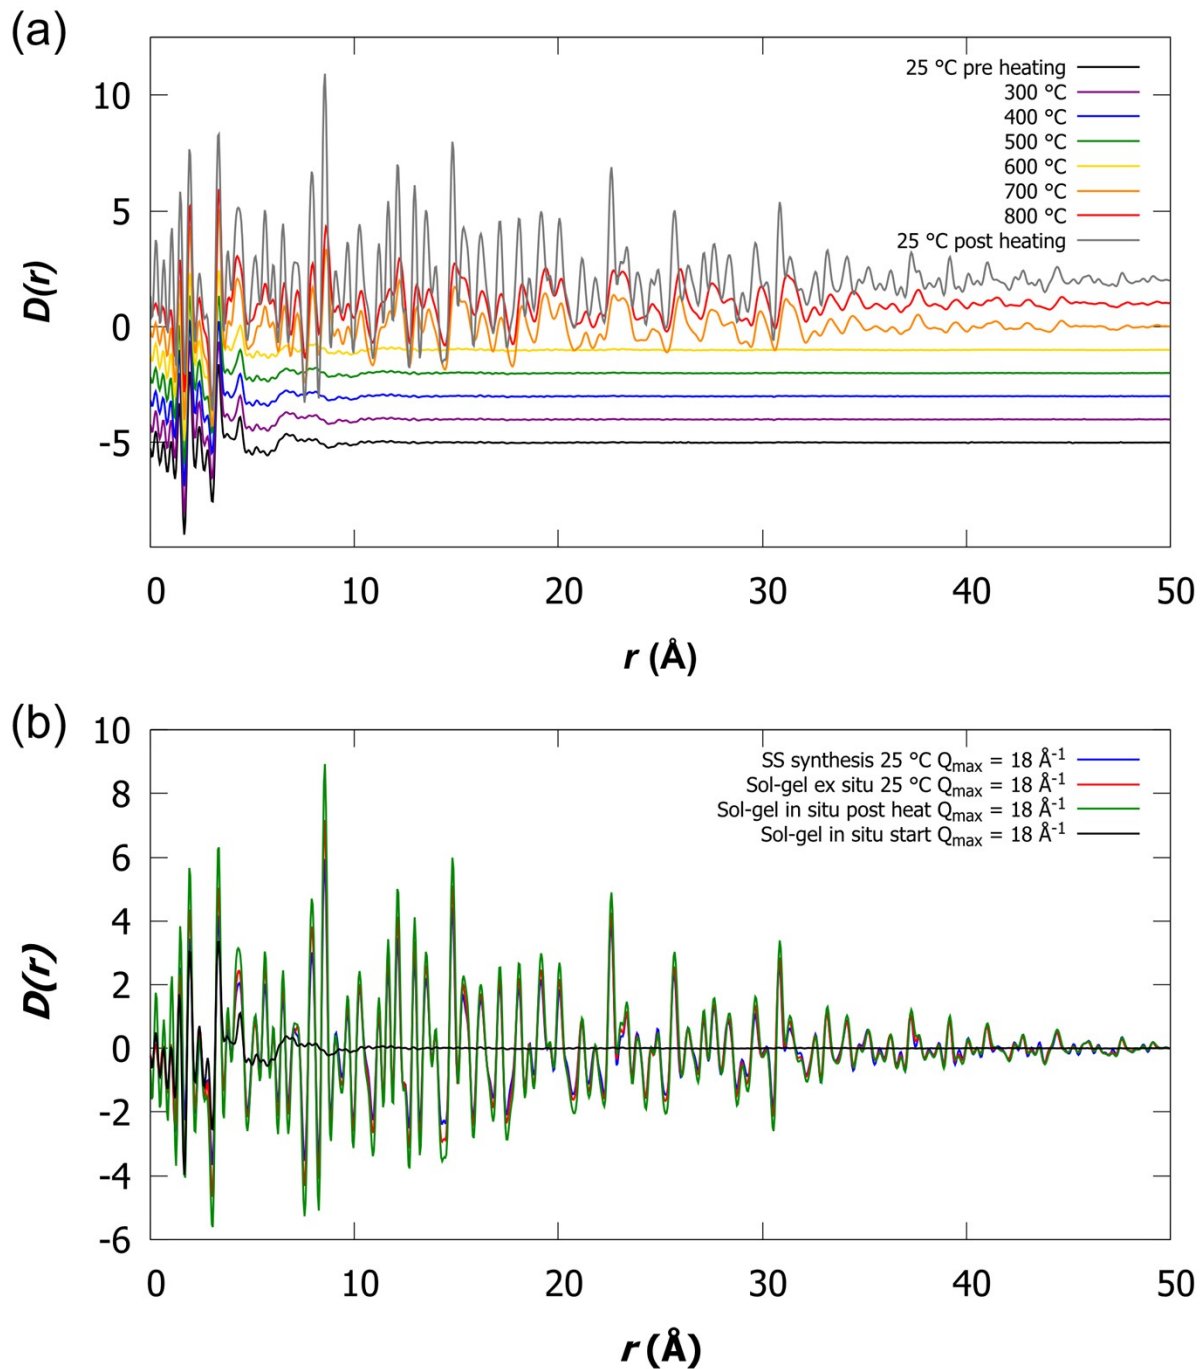

**Figure S7** – X-ray PDF patterns of  $\text{LiTi}_2(\text{PO}_4)_3$  as synthesized using the sol-gel and solid-state method; (a) *in situ* sol-gel X-PDF across the whole  $r$  range; (b) *ex situ* sol-gel, *in situ* sol-gel and *in situ* sol-gel post-heating.

## Neutron Rietveld refinements

Table S1 – selected bond distances for  $\text{LiTi}_2(\text{PO}_4)_3$  given in Å

|     | O1         | O2         |
|-----|------------|------------|
| Ti1 | 1.8823(11) | 1.9812(11) |
| P1  | 1.5349(8)  | 1.5218(6)  |
| Li1 | N/A        | 2.2707(5)  |

Table S2 – selected bond distances for  $\text{Li}_{1.32(5)}\text{Al}_{0.3}\text{Ti}_{1.7}(\text{PO}_4)_3$

|             | O1         | O2        |
|-------------|------------|-----------|
| Ti1/Al<br>1 | 1.8801(18) | 1.977(2)  |
| P1          | 1.5349(8)  | 1.5246(9) |
| Li1         | N/A        | 2.2760(7) |
| Li2         | 2.20(5)    | 2.12(9)   |

Table S3 – selected bond distances for  $\text{Li}_{3.01(4)}\text{Ti}_2(\text{PO}_4)_3$

|     | O1         | O2         | O3       | O4       |
|-----|------------|------------|----------|----------|
| Ti1 | 2.056(3)   | N/A        | 2.026(3) | N/A      |
| Ti2 | N/A        | 2.056(3)   | N/A      | 2.048(3) |
| P1  | 1.5392(16) | 1.5214(19) | 1.532(2) | 1.545(2) |
| Li1 | 2.026(6)   | 2.000(5)   | N/A      | 1.979(5) |
| Li2 | 2.002(17)  | 1.939(19)  | 2.17(2)  | 3.13(3)  |

Table S4 – selected bond distances for  $\text{Li}_{2.96(5)}\text{Al}_{0.273(7)}\text{Ti}_{1.727(7)}(\text{PO}_4)_3$

|             | O1         | O2       | O3       | O4       |
|-------------|------------|----------|----------|----------|
| Ti1/Al<br>1 | 2.005(4)   | N/A      | 2.012(4) | N/A      |
| Ti2/Al<br>2 | N/A        | 2.061(4) | N/A      | 2.017(4) |
| P1          | 1.5385(18) | 1.511(2) | 1.543(2) | 1.551(3) |
| Li1         | 1.981(6)   | 1.994(5) | N/A      | 1.979(7) |
| Li2         | 2.13(3)    | 2.04(3)  | 2.06(3)  | 2.77(3)  |

## Neutron PDFs

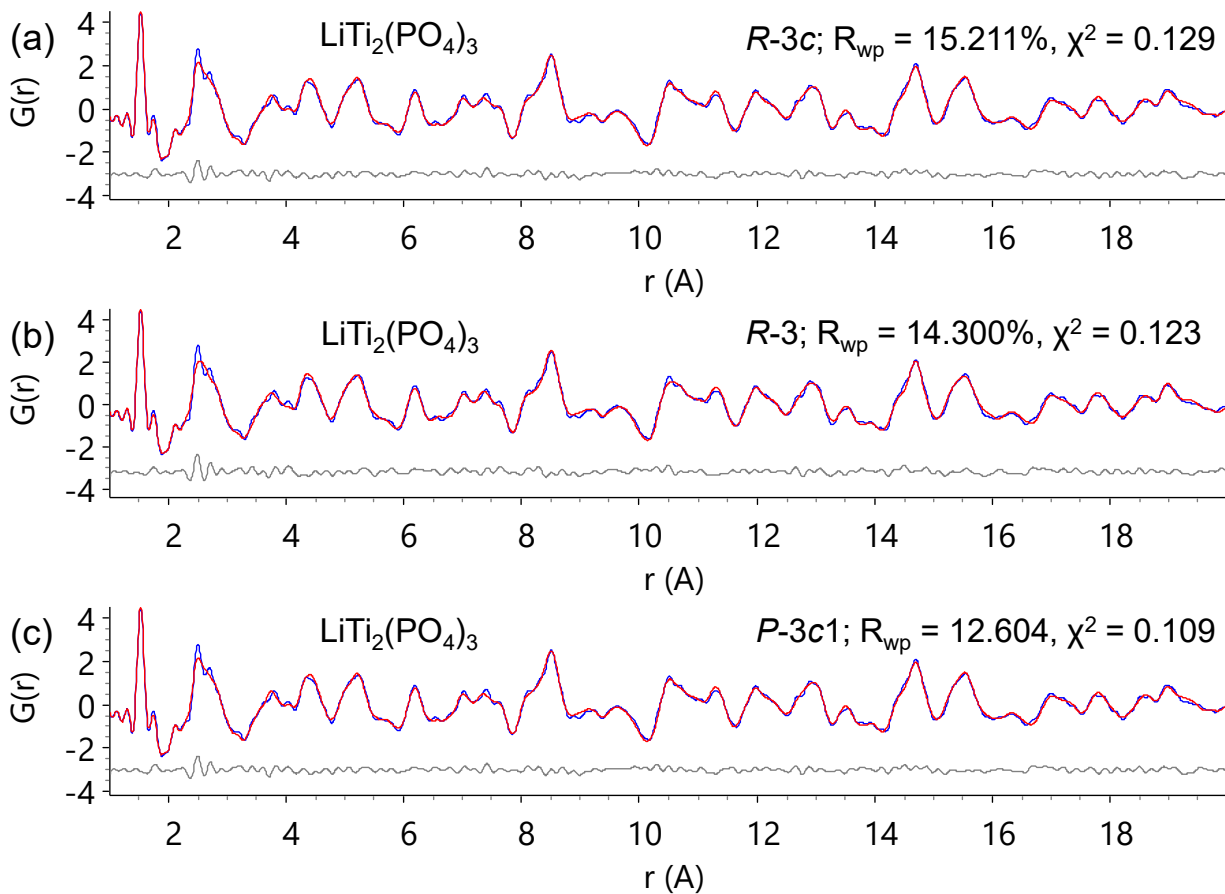

**Figure S8** – Small box neutron PDF refinements of  $\text{LiTi}_2(\text{PO}_4)_3$  using (a)  $R\text{-}3c$  symmetry, (b)  $R\text{-}3$  symmetry and (c)  $P\text{-}3c1$  symmetry. Blue curves = observed PDF, red curves = calculated PDF, grey curves = difference between observed and calculated PDFs.



Table S5 – structural parameters for  $\text{LiTi}_2(\text{PO}_4)_3$  obtained from small box PDF refinements. Space group =

$P-3c1$ ;  $a = 8.5034(9) \text{ \AA}$ ,  $c = 20.821(4) \text{ \AA}$ ,  $\alpha = 90^\circ$ ,  $\gamma = 120^\circ$ ,  $V = 1303.9(4) \text{ \AA}^3$ ,  $R_{\text{wp}} = 12.604\%$ ,  $\chi^2 = 0.109$

| Site label | Wyckoff site | $x$        | $y$        | $z$       | Occupancy |
|------------|--------------|------------|------------|-----------|-----------|
| Ti1_1      | 4c           | 0          | 0          | 0.1381(7) | 1         |
| Ti1_2      | 4d           | 1/3        | 2/3        | 0.4760(4) | 1         |
| Ti1_3      | 4d           | 1/3        | 2/3        | 0.6923(5) | 1         |
| P1_1       | 6f           | 0.7135(7)  | 0          | 1/4       | 1         |
| P1_2       | 12g          | 0.3351(5)  | 0.3756(5)  | 0.5855(2) | 1         |
| O1_1       | 12g          | -0.0006(9) | 0.8064(5)  | 0.1878(2) | 1         |
| O1_2       | 12g          | 0.3316(7)  | 0.4811(6)  | 0.5261(2) | 1         |
| O1_3       | 12g          | 0.6511(10) | 0.1402(10) | 0.8554(3) | 1         |
| O2_1       | 12g          | 0.1589(7)  | -0.0349(8) | 0.0842(3) | 1         |
| O2_2       | 12g          | 0.5034(4)  | 0.6480(5)  | 0.4141(3) | 1         |
| O2_3       | 12g          | 0.8287(6)  | 0.3153(9)  | 0.7456(2) | 1         |
| Li1_1      | 2b           | 0          | 0          | 0         | 1         |
| Li1_2      | 4d           | 1/3        | 2/3        | 0.336(13) | 1         |

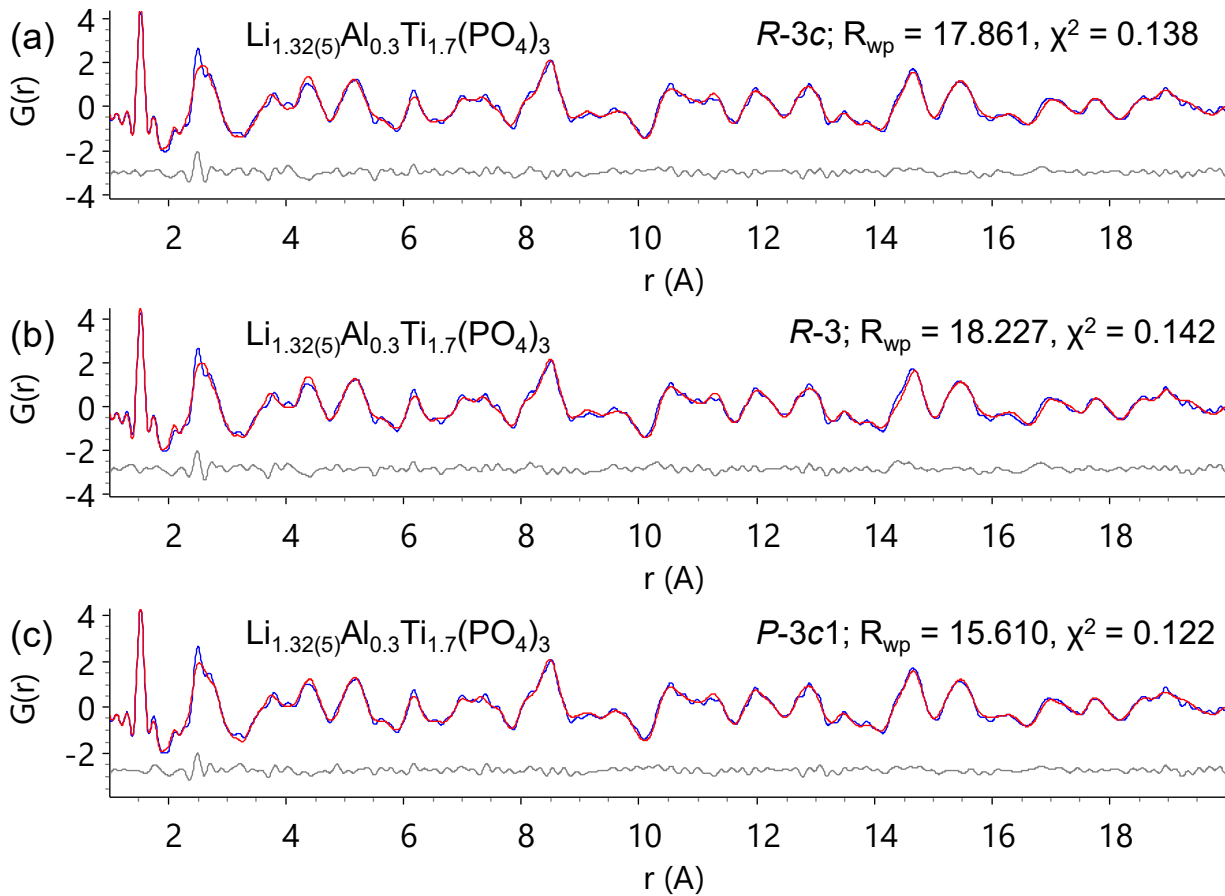

**Figure S9** – Small box neutron PDF refinements of  $\text{Li}_{1.32(5)}\text{Al}_{0.3}\text{Ti}_{1.7}(\text{PO}_4)_3$  using (a)  $R\text{-}3c$  symmetry, (b)  $R\text{-}3$  symmetry and (c)  $P\text{-}3c1$  symmetry. Blue curves = observed PDF, red curves = calculated PDF, grey curves = difference between observed and calculated PDFs.

Table S6 – structural parameters for  $\text{Li}_{1.32(5)}\text{Al}_{0.3}\text{Ti}_{1.7}(\text{PO}_4)_3$  obtained from small box PDF refinements.

Space group =  $P-3c1$ ;  $a = 8.4895(15) \text{ \AA}$ ,  $c = 20.780(6) \text{ \AA}$ ,  $\alpha = 90^\circ$ ,  $\gamma = 120^\circ$ ,  $V = 1297.0(6) \text{ \AA}^3$ ,  $R_{\text{wp}} = 15.610\%$ ,  $\chi^2 = 0.122$

| Site label | Wyckoff site | <i>x</i>   | <i>y</i>   | <i>z</i>   | Occupancy |
|------------|--------------|------------|------------|------------|-----------|
| Ti1_1      | 4 <i>c</i>   | 0          | 0          | 0.1356(13) | 0.85      |
| Al1_1      | 4 <i>c</i>   | 0          | 0          | 0.1356(13) | 0.15      |
| Ti1_2      | 4 <i>d</i>   | 1/3        | 2/3        | 0.4760(10) | 0.85      |
| Al1_2      | 4 <i>d</i>   | 1/3        | 2/3        | 0.4760(10) | 0.15      |
| Ti1_3      | 4 <i>d</i>   | 1/3        | 2/3        | 0.6943(12) | 0.85      |
| Al1_3      | 4 <i>d</i>   | 1/3        | 2/3        | 0.6943(12) | 0.15      |
| P1_1       | 6 <i>f</i>   | 0.7124(18) | 0          | 1/4        | 1         |
| P1_2       | 12 <i>g</i>  | 0.3356(13) | 0.3748(8)  | 0.5865(3)  | 1         |
| O1_1       | 12 <i>g</i>  | 0.0005(18) | 0.810(2)   | 0.1887(7)  | 1         |
| O1_2       | 12 <i>g</i>  | 0.3276(16) | 0.4754(17) | 0.5240(5)  | 1         |
| O1_3       | 12 <i>g</i>  | 0.6523(13) | 0.1384(13) | 0.8557(3)  | 1         |
| O2_1       | 12 <i>g</i>  | 0.1630(17) | -0.027(2)  | 0.0846(6)  | 1         |
| O2_2       | 12 <i>g</i>  | 0.4971(19) | 0.645(2)   | 0.4146(7)  | 1         |
| O2_3       | 12 <i>g</i>  | 0.8305(13) | 0.3145(16) | 0.7450(5)  | 1         |
| Li1_1      | 2 <i>b</i>   | 0          | 0          | 0          | 0.85      |
| Li1_2      | 4 <i>d</i>   | 1/3        | 2/3        | 0.335(19)  | 0.85      |
| Li2_1      | 12 <i>g</i>  | 0.28(2)    | 0.187(18)  | 0.047(7)   | 0.077     |
| Li2_2      | 12 <i>g</i>  | 0.636(13)  | -0.058(12) | 0.384(5)   | 0.077     |
| Li2_3      | 12 <i>g</i>  | 0.092(11)  | 0.699(12)  | 0.780(5)   | 0.077     |

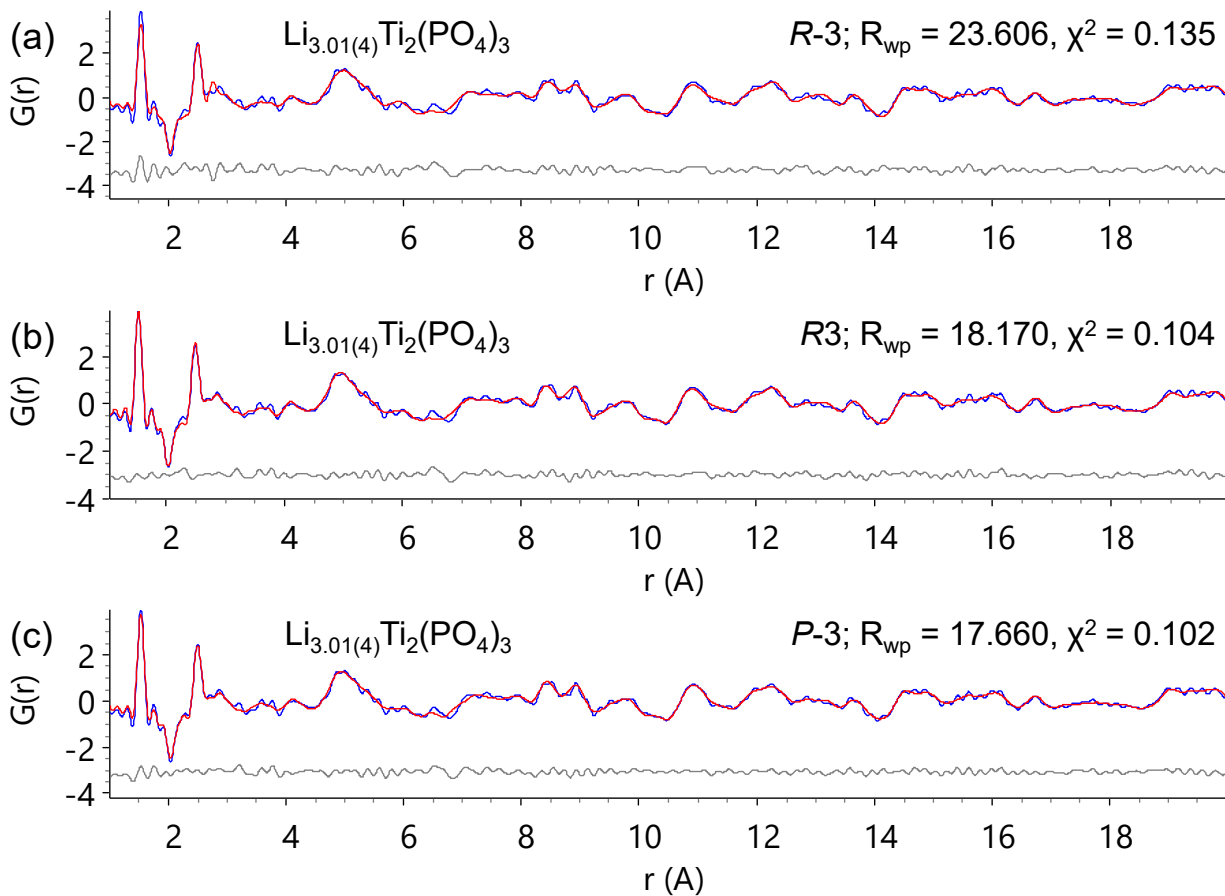

**Figure S10** – Small box neutron PDF refinements of  $\text{Li}_{3.01(4)}\text{Ti}_2(\text{PO}_4)_3$  using (a)  $R\text{-}3$  symmetry, (b)  $R3$  symmetry and (c)  $P\text{-}3$  symmetry. Blue curves = observed PDF, red curves = calculated PDF, grey curves = difference between observed and calculated PDFs.

Table S7 – structural parameters for  $\text{Li}_{3.01(4)}\text{Ti}_2(\text{PO}_4)_3$  obtained from small box PDF refinements. Space group =  $P-3$ ;  $a = 8.376(2) \text{ \AA}$ ,  $c = 22.808(10) \text{ \AA}$ ,  $\alpha = 90^\circ$ ,  $\gamma = 120^\circ$ ,  $V = 1385.9(9) \text{ \AA}^3$ ,  $R_{\text{wp}} = 17.666\%$ ,  $\chi^2 =$

0.102

| Site label | Wyckoff site | $x$        | $y$       | $z$         | Occupancy |
|------------|--------------|------------|-----------|-------------|-----------|
| Ti1_1      | 2c           | 0          | 0         | 0.145(4)    | 1         |
| Ti1_2      | 2d           | 1/3        | 2/3       | 0.479(5)    | 1         |
| Ti1_3      | 2d           | 1/3        | 2/3       | 0.215(2)    | 1         |
| Ti2_1      | 2c           | 0          | 0         | 0.352(3)    | 1         |
| Ti2_2      | 2d           | 1/3        | 2/3       | 0.684(4)    | 1         |
| Ti2_3      | 2d           | 1/3        | 2/3       | -0.015(3)   | 1         |
| P1_1       | 6g           | 0.002(5)   | 0.716(3)  | 0.2500(17)  | 1         |
| P1_2       | 6g           | 0.330(5)   | 0.371(4)  | 0.5848(12)  | 1         |
| P1_3       | 6g           | 0.667(4)   | 0.040(5)  | -0.0845(15) | 1         |
| O1_1       | 6g           | 0.213(5)   | 0.052(4)  | 0.0918(11)  | 1         |
| O1_2       | 6g           | 0.547(5)   | 0.716(5)  | 0.4233(15)  | 1         |
| O1_3       | 6g           | 0.887(4)   | 0.385(5)  | 0.7538(11)  | 1         |
| O2_1       | 6g           | 0.895(3)   | 0.411(3)  | 0.0598(10)  | 1         |
| O2_2       | 6g           | 0.237(3)   | 0.112(3)  | 0.4055(9)   | 1         |
| O2_3       | 6g           | 0.563(4)   | 0.757(3)  | 0.7321(12)  | 1         |
| O3_1       | 6g           | -0.002(4)  | 0.801(5)  | 0.1931(12)  | 1         |
| O3_2       | 6g           | 0.329(4)   | 0.468(4)  | 0.5280(12)  | 1         |
| O3_3       | 6g           | 0.658(4)   | 0.138(4)  | 0.8616(13)  | 1         |
| O4_1       | 6g           | 0.137(3)   | 0.227(3)  | 0.2979(12)  | 1         |
| O4_2       | 6g           | 0.481(4)   | -0.103(3) | 0.6316(10)  | 1         |
| O4_3       | 6g           | 0.820(3)   | 0.580(2)  | -0.0333(12) | 1         |
| Li1_1      | 6g           | 0.316(16)  | 0.290(16) | 0.044(4)    | 0.8902    |
| Li1_2      | 6g           | 0.638(10)  | -0.051(9) | 0.387(3)    | 0.8902    |
| Li1_3      | 6g           | -0.023(15) | 0.625(16) | 0.708(3)    | 0.8902    |
| Li2_1      | 6g           | 0.71(4)    | 0.14(4)   | 0.114(13)   | 0.19527   |
| Li2_2      | 6g           | 0.06(4)    | 0.81(4)   | 0.470(11)   | 0.19527   |
| Li2_3      | 6g           | 0.40(4)    | 0.46(5)   | 0.812(13)   | 0.19527   |

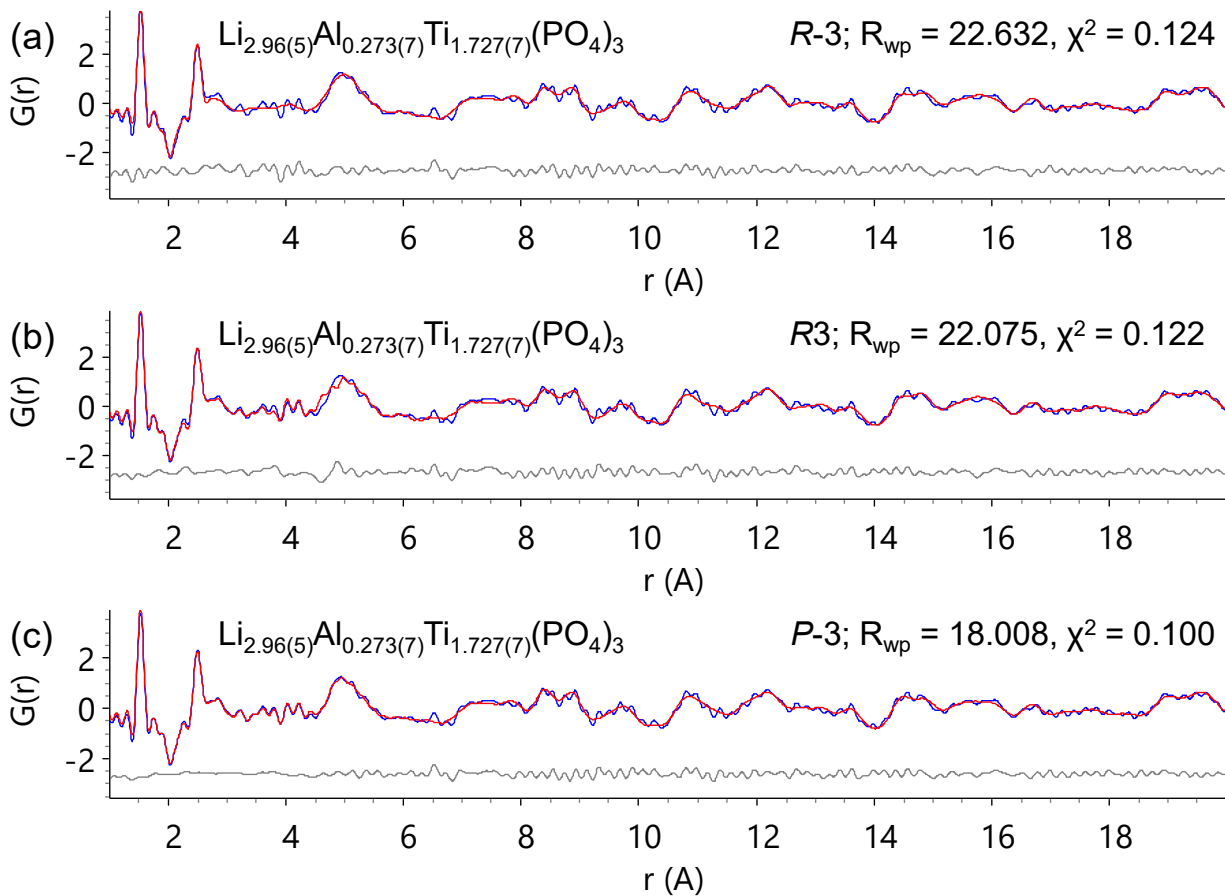

**Figure S11** – Small box neutron PDF refinements of  $\text{Li}_{2.96(5)}\text{Al}_{0.273(7)}\text{Ti}_{1.727(7)}(\text{PO}_4)_3$  using (a)  $R\text{-}3$  symmetry, (b)  $R\text{-}3$  symmetry and (c)  $P\text{-}3$  symmetry. Blue curves = observed PDF, red curves = calculated PDF, grey curves = difference between observed and calculated PDFs.

Table S8 – structural parameters for  $\text{Li}_{2.96(5)}\text{Al}_{0.273(7)}\text{Ti}_{1.727(7)}(\text{PO}_4)_3$  obtained from small box PDF refinements. Space group =  $P-3$ ;  $a = 8.347(2)$  Å,  $c = 22.591(13)$  Å,  $\alpha = 90^\circ$ ,  $\gamma = 120^\circ$ ,  $V = 1363.3(11)$  Å<sup>3</sup>,

$R_{\text{wp}} = 17.666\%$ ,  $\chi^2 = 0.102$

| Site label | Wyckoff site | $x$        | $y$        | $z$        | Occupancy |
|------------|--------------|------------|------------|------------|-----------|
| Ti1_1      | 2c           | 0          | 0          | 0.141(3)   | 0.87041   |
| Al1_1      | 2c           | 0          | 0          | 0.141(3)   | 0.12959   |
| Ti1_2      | 2d           | 1/3        | 2/3        | 0.471(3)   | 0.87041   |
| Al1_2      | 2d           | 1/3        | 2/3        | 0.471(3)   | 0.12959   |
| Ti1_3      | 2d           | 1/3        | 2/3        | 0.191(3)   | 0.87041   |
| Al1_3      | 2d           | 1/3        | 2/3        | 0.191(3)   | 0.12959   |
| Ti2_1      | 2c           | 0          | 0          | 0.352(5)   | 0.85617   |
| Al2_1      | 2c           | 0          | 0          | 0.352(5)   | 0.14383   |
| Ti2_2      | 2d           | 1/3        | 2/3        | 0.686(5)   | 0.85617   |
| Al2_2      | 2d           | 1/3        | 2/3        | 0.686(5)   | 0.14383   |
| Ti2_3      | 2d           | 1/3        | 2/3        | -0.019(3)  | 0.85617   |
| Al2_3      | 2d           | 1/3        | 2/3        | -0.019(3)  | 0.14383   |
| P1_1       | 6g           | -0.004(5)  | 0.709(4)   | 0.2502(10) | 1         |
| P1_2       | 6g           | 0.330(3)   | 0.369(3)   | 0.5888(9)  | 1         |
| P1_3       | 6g           | 0.667(4)   | 0.043(3)   | -0.0839(8) | 1         |
| O1_1       | 6g           | 0.214(3)   | 0.045(2)   | 0.0907(6)  | 1         |
| O1_2       | 6g           | 0.549(3)   | 0.721(3)   | 0.4192(9)  | 1         |
| O1_3       | 6g           | 0.884(3)   | 0.386(2)   | 0.7569(10) | 1         |
| O2_1       | 6g           | 0.9021(18) | 0.4349(18) | 0.0729(6)  | 1         |
| O2_2       | 6g           | 0.226(2)   | 0.0943(19) | 0.3985(11) | 1         |
| O2_3       | 6g           | 0.565(3)   | 0.758(2)   | 0.7280(9)  | 1         |
| O3_1       | 6g           | -0.013(2)  | 0.811(2)   | 0.1939(7)  | 1         |
| O3_2       | 6g           | 0.340(2)   | 0.477(2)   | 0.5284(7)  | 1         |
| O3_3       | 6g           | 0.665(3)   | 0.145(3)   | 0.8625(9)  | 1         |
| O4_1       | 6g           | 0.149(3)   | 0.230(3)   | 0.2990(8)  | 1         |
| O4_2       | 6g           | 0.474(3)   | -0.101(3)  | 0.6338(6)  | 1         |
| O4_3       | 6g           | 0.818(2)   | 0.5761(14) | -0.0329(8) | 1         |
| Li1_1      | 6g           | 0.722(8)   | 0.037(7)   | 0.049(3)   | 0.807     |
| Li1_2      | 6g           | 0.032(6)   | 0.671(4)   | 0.371(2)   | 0.807     |
| Li1_3      | 6g           | 0.388(6)   | 0.359(5)   | 0.721(2)   | 0.807     |
| Li2_1      | 6g           | 0.34(3)    | 0.36(2)    | 0.132(9)   | 0.179     |
| Li2_2      | 6g           | 0.71(3)    | 0.06(3)    | 0.467(9)   | 0.179     |
| Li2_3      | 6g           | 0.07(3)    | 0.69(3)    | 0.804(9)   | 0.179     |

**X-ray diffraction patterns of  $\text{Li}_{1+x}\text{Al}_x\text{Ti}_{2-x}(\text{PO}_4)_3$  and  $\text{Li}_3\text{Al}_x\text{Ti}_{2-x}(\text{PO}_4)_3$  ( $x = 0, 0.3$ ) samples made for electrochemical impedance measurements**

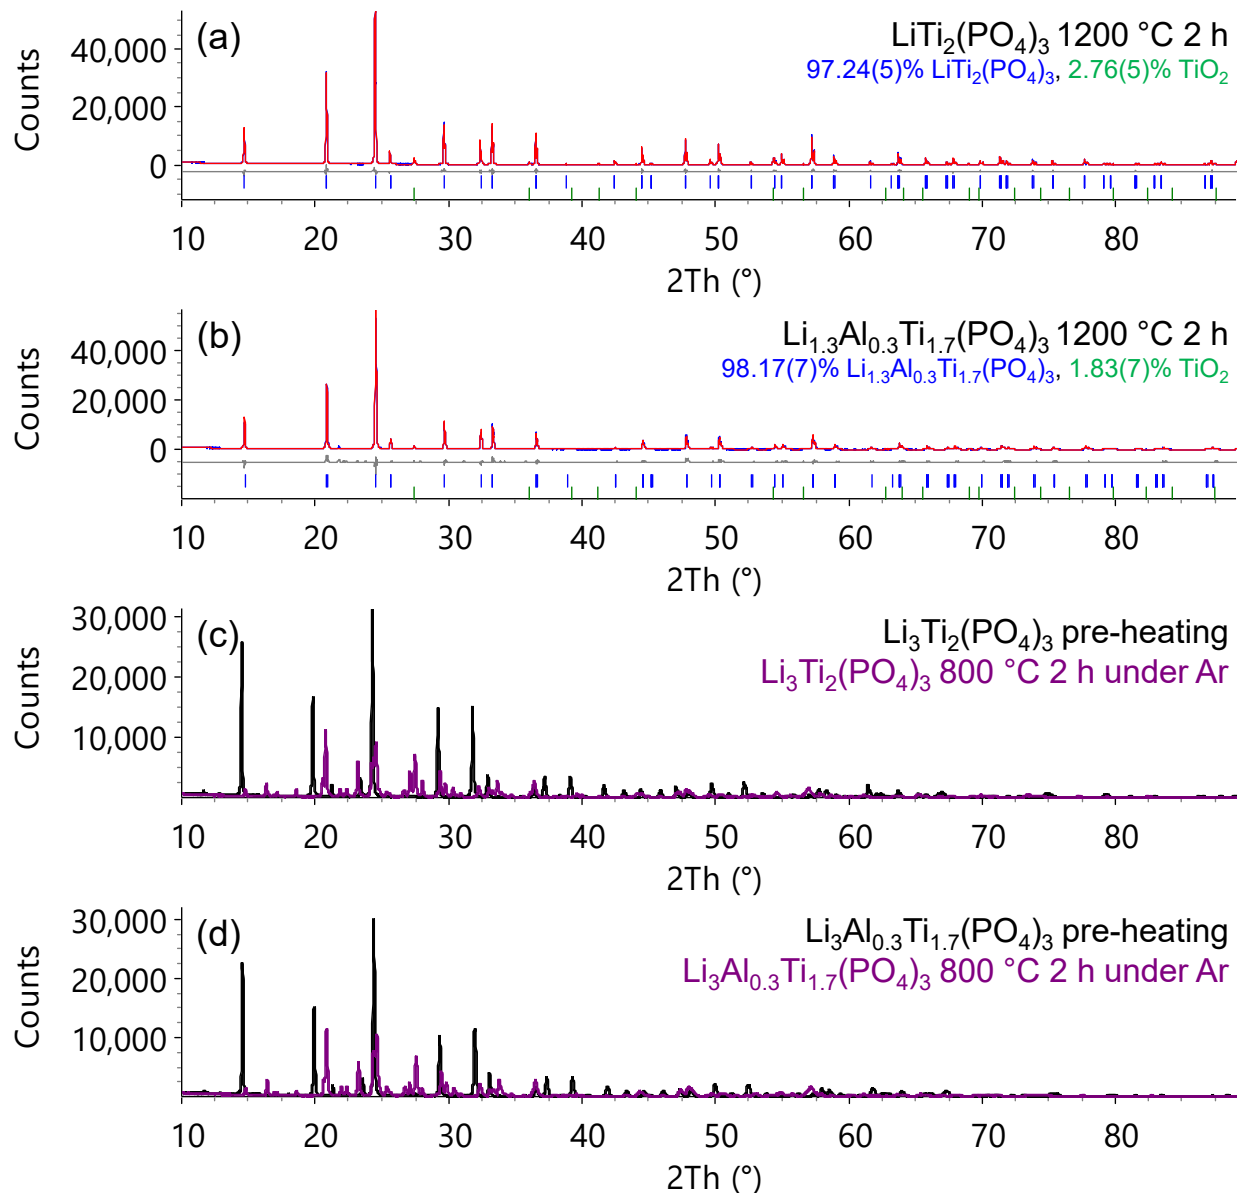

**Figure S12** – (a – b) Rietveld plots of  $\text{Li}_{1+x}\text{Al}_x\text{Ti}_{2-x}(\text{PO}_4)_3$  and (c – d) raw X-ray diffraction patterns of  $\text{Li}_3\text{Al}_x\text{Ti}_{2-x}(\text{PO}_4)_3$  ( $x = 0, 0.3$ ) sintered pellets; (a)  $\text{LiTi}_2(\text{PO}_4)_3$  heated to 1200 °C for 2 h (b)  $\text{Li}_{1.3}\text{Al}_{0.3}\text{Ti}_{1.7}(\text{PO}_4)_3$  heated to 1200 °C 2 h; blue curves = observed data, red curves = calculated pattern; grey curves = difference between calculated and observed data; blue tick marks = reflections arising from NASICON structure; green tick marks = reflections from  $\text{TiO}_2$ . (c)  $\text{Li}_3\text{Ti}_2(\text{PO}_4)_3$  before heating and after heating to 800 °C for 2 h; (d)  $\text{Li}_3\text{Al}_{0.3}\text{Ti}_{1.7}(\text{PO}_4)_3$  before heating and after heating to 800 °C for 2 h; black curves = before heating; purple curves = after heating. Heating and cooling rates in all samples were  $\pm 5 \text{ }^\circ\text{C min}^{-1}$ .



## Electrochemical impedance spectra

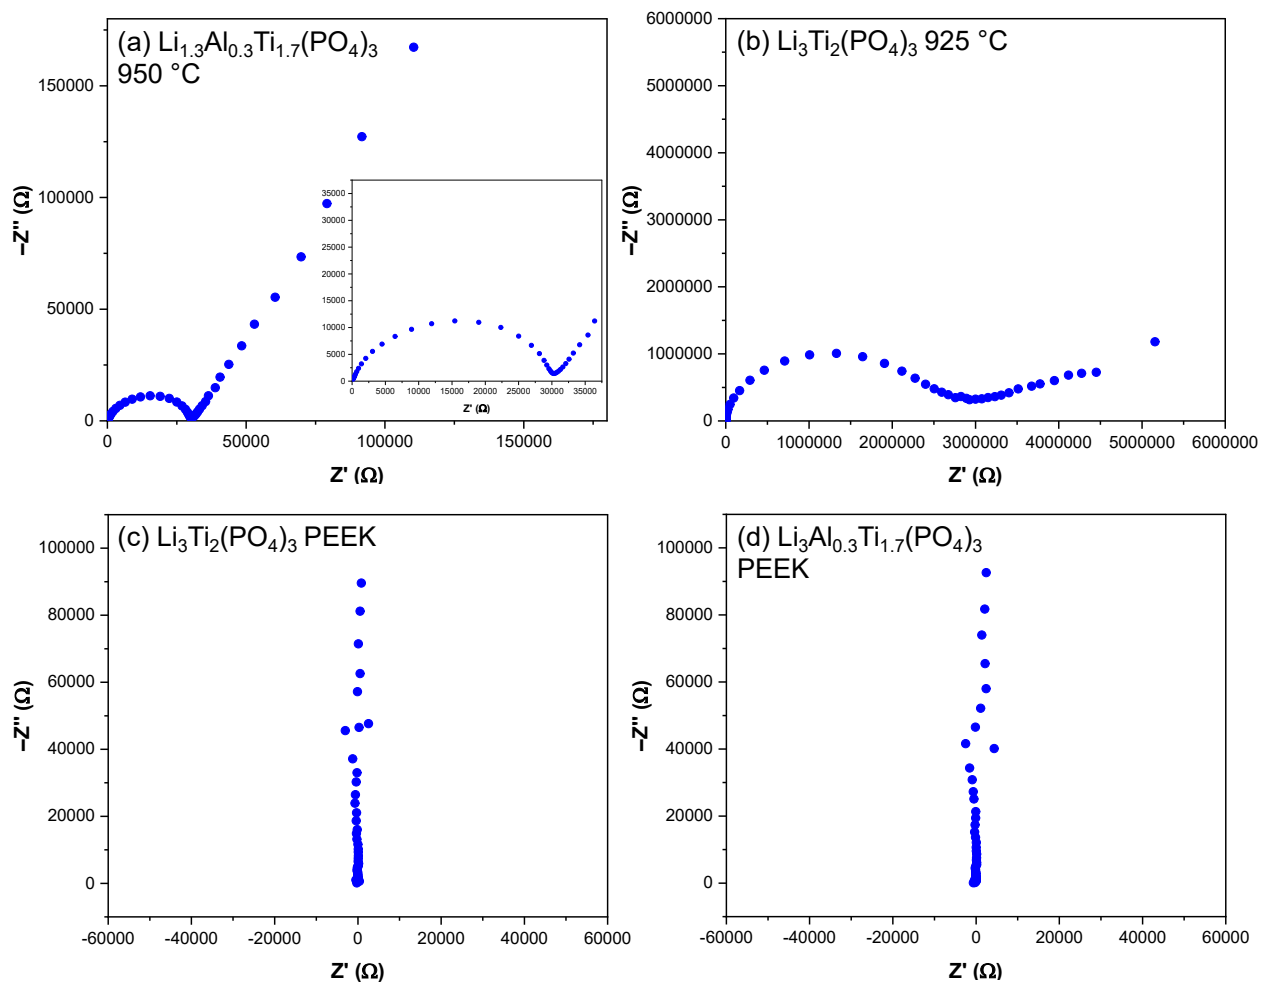

**Figure S13** – Nyquist plots of (a)  $\text{Li}_{1.3}\text{Al}_{0.3}\text{Ti}_{1.7}(\text{PO}_4)_3$  sintered at  $950^\circ\text{C}$  for 6 h; (b)  $\text{Li}_3\text{Ti}_2(\text{PO}_4)_3$  sintered at  $925^\circ\text{C}$  for 2 h under flowing Ar; (c) PEEK cell measurement of  $\text{Li}_3\text{Ti}_2(\text{PO}_4)_3$ ; (d) PEEK cell measurement of  $\text{Li}_3\text{Al}_{0.3}\text{Ti}_{1.7}(\text{PO}_4)_3$ . (c – d) show a similar response of pure capacitors, suggesting that there was no cold-sintering of the “pellets” in the PEEK cell.
